# Supplementary material for: Haematopoietic stem cell transplantation for treatment of relapsing-remitting multiple sclerosis in Sweden: an observational cohort study
Source: PubMed Central journal article supplement — J Neurol Neurosurg Psychiatry. 2023 Sep 25;95(2):125–33. doi: 10.1136/jnnp-2023-331864 (PMC10850659; doi:10.1136/jnnp-2023-331864), 2023-09-25
Supplement: jnnp-2023-331864supp001.pdf [file jnnp-2023-331864supp001.pdf]

## Supplement 1 – Data points

### Baseline data

- birth date
- gender
- transplantation clinic
- clinical course (RRMS, SPMS or PPMS)
- disease onset
- diagnosis date
- previous DMT(s)
- number and dates of relapses prior to aHSCT
- results and dates of MRI investigations prior to aHSCT
- results and dates of EDSS scoring prior to aHSCT
- wash-out period prior to aHSCT
- comorbidities

### aHSCT data

- date of mobilisation
- date of stem cell harvest
- date of admission and discharge for aHSCT
- date of aHSCT
- drugs used in mobilisation and conditioning including dosage
- G-CSF given post aHSCT
- days to engraftment
- intensive care (yes/no) including reason
- body weight at admission and discharge
- plasma-albumin at admission and discharge
- specific days with fever
- clinical diagnosis of infection
- reactivation of CMV, EBV or other herpes viruses
- bacteremia (species)
- culture negative fever
- hemorrhagic cystitis (yes/no)
- days with intravenous antibiotics including substance
- fungal infection (culture or clinical diagnosis)
- serious adverse events grade three or higher according to the CTCAE.

### Follow-up data

- number and dates of relapses after aHSCT,
- results and dates of MRI investigations after aHSCT
- results and dates of EDSS and MSIS-29 scoring after aHSCT
- serious adverse events grade three or higher according to CTCAE until day +100
- subsequent DMT
- date of last follow-up.

## Supplement 2 - Definitions

### *Annualised relapse rate*

The number of relapses occurring during a time period divided by the number of years in that time period. E.g. 5 relapses occurring in a time period of 2.5 years equals an ARR of 2 ( $5/2.5=2$ ).

### *Confirmed disability improvement*

If baseline EDSS  $\leq 5.5$ : A decrease in EDSS score with at least 1 point from baseline that is sustained between two follow-up visits separated in time by no less than six months.

If baseline EDSS  $\geq 6$ : A decrease in EDSS score with at least 0.5 points from baseline that is sustained between two follow-up visits separated in time by no less than six months.

### *Clinically isolated syndrome*

According to the Lublin *et al* criteria from 2014.<sup>25</sup>

### *Confirmed disability worsening*

If baseline EDSS  $\leq 5$ : An increase in EDSS score with at least 1 point from baseline that is sustained between two follow-up visits separated in time by no less than six months.

If baseline EDSS  $\geq 5.5$ : An increase in EDSS score with at least 0.5 points from baseline that is sustained between two follow-up visits separated in time by no less than six months.

### *Clinical relapse*

A period of acute worsening of neurological function lasting  $\geq 24$  hours not attributable to an external cause such as increased body temperature or acute infection.

### *EDSS*

The Kurtzke Expanded Disability Status Scale (EDSS) is a method of quantifying disability in multiple sclerosis. The EDSS is a composite of disability in eight functional systems.<sup>26</sup>

### *Engraftment*

ANC 0.5 or higher and TPK  $>20$  and rising, without transfusion of thrombocytes.

### *MRI event*

The appearance of any T2 lesion  $> 3$  mm or gadolinium enhancing lesion in the brain or spinal cord not present on the baseline scan.

### *Multiple sclerosis, diagnosis*

Diagnosis according to the revised McDonald Criteria from 2017.<sup>24</sup>

### *No evidence of disease activity (NEDA)*

The absence of clinical relapses in addition to absence of confirmed disability worsening and MRI events.

### *Primary Progressive multiple sclerosis (PPMS)*

According to the Lublin *et al* criteria from 2014.<sup>25</sup>

### *Progressive disease*

According to the Lublin *et al* criteria from 2014.<sup>25</sup>

### *Relapsing/remitting multiple sclerosis*

According to the Lublin *et al* criteria from 2014.<sup>25</sup>

### *Treatment related mortality (TRM)*

Death due to any transplantation-related cause other than disease progression.
